# Supplementary material
Source: HighWire-hosted journal article supplement (https://jnm.snmjournals.org/highwire/filestream/95323/field_highwire_adjunct_files/0/208348_Supplemental_Data.pdf)
Supplement: 208348_Supplemental_Data.pdf [file 208348_Supplemental_Data.pdf]

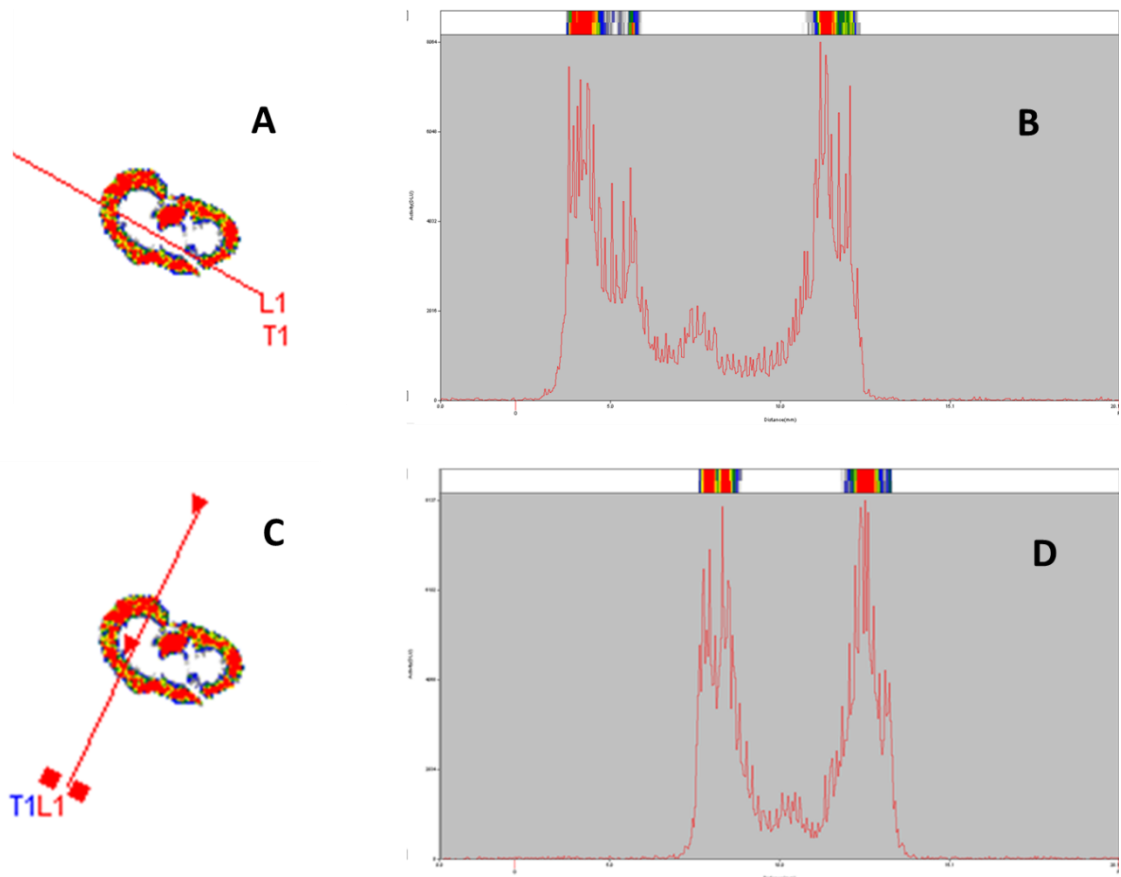

**Supplemental Fig.1** Evaluation of distribution of  $^{177}\text{Lu}$ -HP2 in kidneys. Two BALB/C nu/nu mice were injected with  $100\ \mu\text{g}$  ( $7.6\ \text{nmol}$ )  $Z_{\text{HER2}:342}\text{-SR-HP1}$  each.  $^{177}\text{Lu}$ -HP2,  $3\ \mu\text{g}$  ( $1\ \text{MBq}$ ) per mouse, was injected 16 h later. Animals were sacrificed 1 h after injection of  $^{177}\text{Lu}$ -HP2. Kidneys were excised and  $20\ \mu\text{m}$ -cryosections were prepared. Distribution of radioactivity in the sections was measured by digital autoradiography using a Cyclone Storage Phosphor System (PerkinElmer). (A) and (C) show digital autoradiography of a kidney. (B) and (D) show distribution of radioactivity along the lines marked in (A) and (C), respectively.

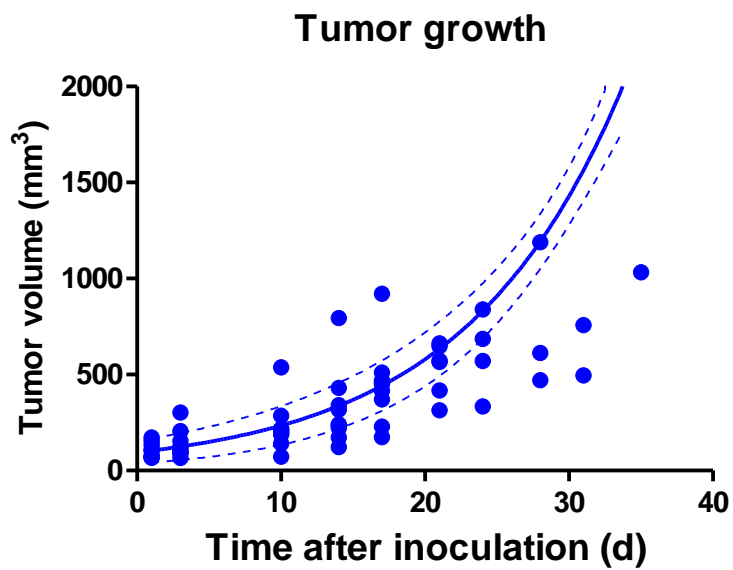

**Supplemental Fig.2** SKOV-3 xenograft growth data, which were used for calculations of absorbed doses to tumors.
